# Supplementary material for: CD11b suppresses TLR activation of nonclassical monocytes to reduce primary graft dysfunction after lung transplantation
Source: PubMed Central journal article supplement (PMC9282933; doi:10.1172/jci157262), 2022-07-15
Supplement: jci-132-157262-s029.pdf [file jci-132-157262-s029.pdf]

## SUPPLEMENTAL MATERIAL

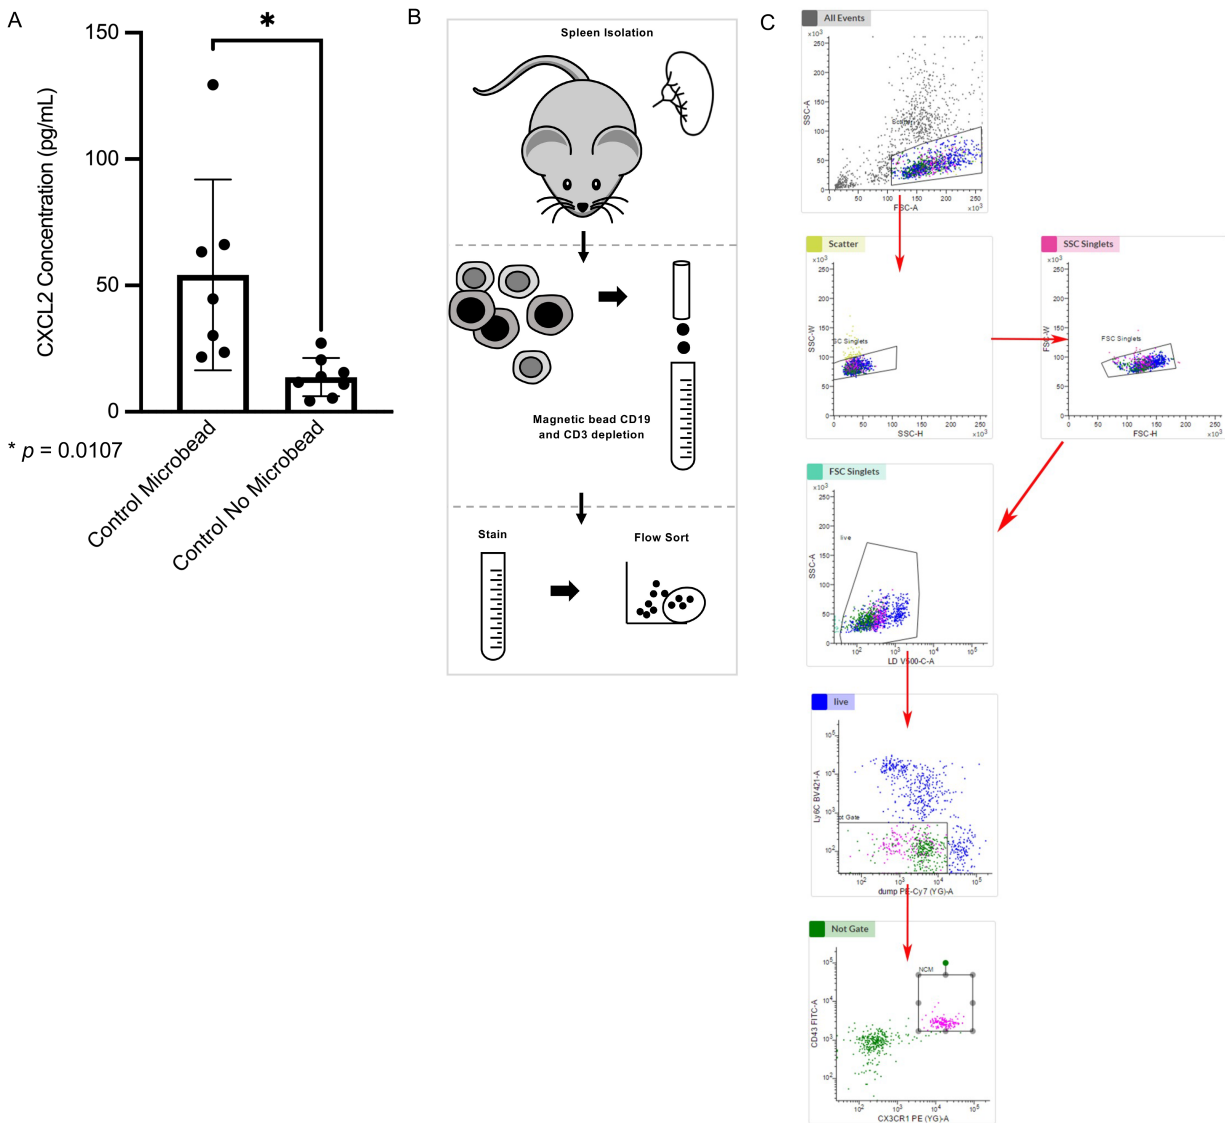

### Supplemental Figure 1. NCM negative selection flow cytometry sorting strategy.

(S1A) Splenic non-classical monocytes isolated with and without CD11b microbeads in the absence of stimulation.  $P$ -value was calculated using an unpaired t-test. (S1B) Splenic non-classical monocytes were isolated using a negative selection strategy where CD19<sup>+</sup> and CD3<sup>+</sup> cells are depleted from single cell suspensions using magnetic beads. (S1C) The remaining cell suspension is flow cytometry sorted for non-classical monocytes by negatively selecting cells without CD19, CD3, MHCII, MerTK, Ly6G, NK1.1, and CD11c and then positively selecting CD43<sup>+</sup>CX3CR1<sup>hi</sup> cells.

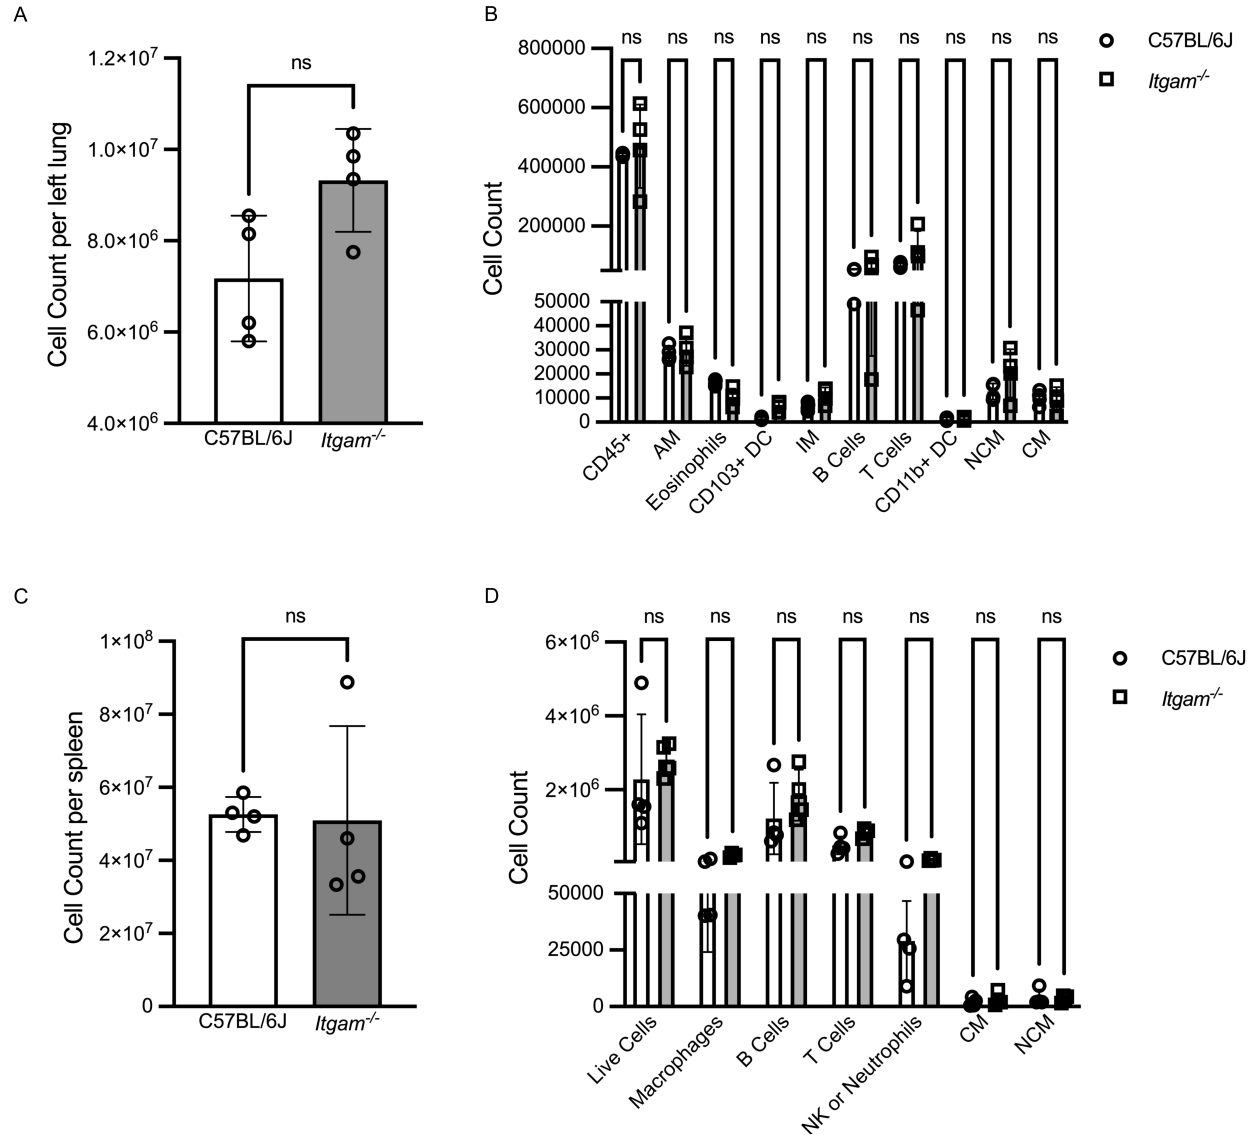

**Supplemental Figure S2. *Itgam*<sup>-/-</sup> mice spleen and lung phenotypes are similar to C57BL/6J controls at baseline**  
**(S2A)** Cell count per left lung in C57BL/6J and *Itgam*<sup>-/-</sup> mice. *P*-value was calculated using an unpaired t-test. **(S2B)** Immune cell counts in C57BL/6J and *Itgam*<sup>-/-</sup> lungs. *P*-values were calculated using a one-way ANOVA. **(S2C)** Cell count in spleens of C57BL/6J and *Itgam*<sup>-/-</sup> mice. *P*-value were calculated using an unpaired t-test. **(S2D)** Immune cell counts in C57BL/6J and *Itgam*<sup>-/-</sup> spleens. *P*-values were calculated using a one-way ANOVA. Each point represents an individual mouse.

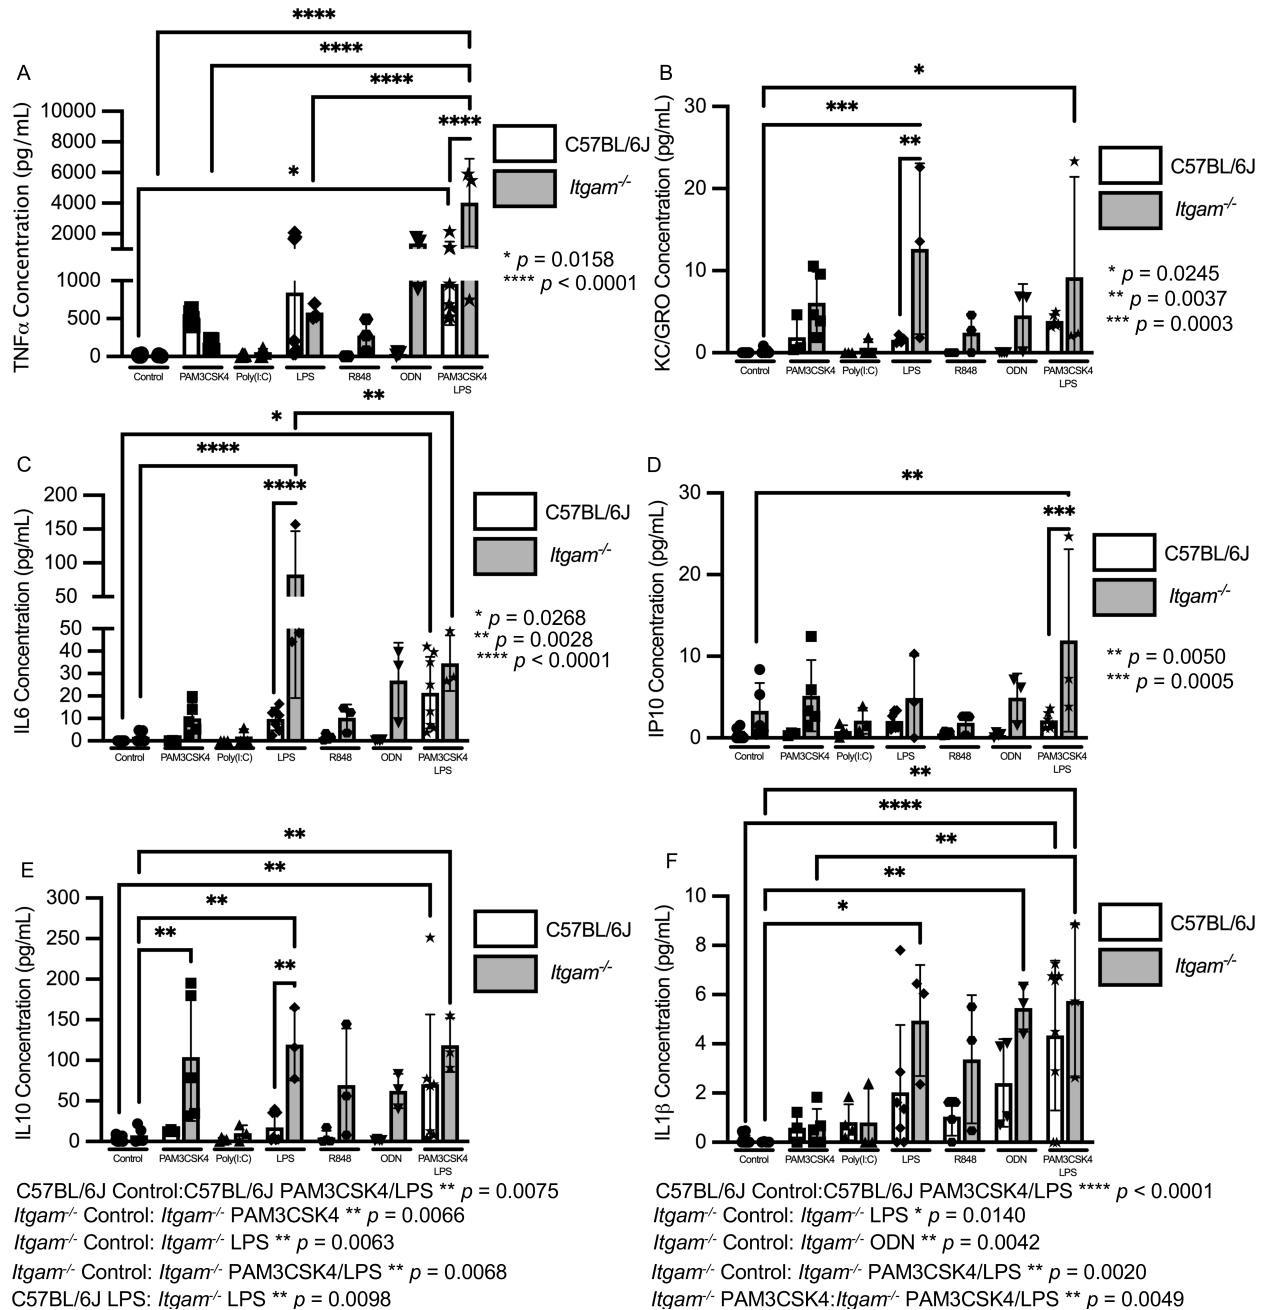

**Supplemental Figure S3. *Itgam*<sup>-/-</sup> increases production in multiple inflammatory cytokines in response to TLR2 and TLR4 agonists.** Splenic non-classical monocytes were flow cytometry sorted from wildtype (C57BL/6J) and *Itgam*<sup>-/-</sup> mice and stimulated with TLR agonists as indicated for 4 hours after which the supernatants are collected for ELISA analysis: TNF $\alpha$  (S3A), KC/GRO (S3B), IP10 (S3C), IL10 (S3D), IL6 (S3E), and IL1 $\beta$  (S3F). *P*-values were calculated by a one-way ANOVA with Sidak's multiple comparisons. PAM3CSK4, polyinosinic:polycytidylic acid (Poly(I:C)), lipopolysaccharide (LPS), Resiquimod (R848), and oligodeoxynucleotide (ODN), and PAM3CSK4 and LPS. All agonists were administered at a dose of 1 $\mu$ g. Each symbol represents 50,000 nonclassical monocytes, ~100,000 – 200,000 cells are isolated in an individual mouse.

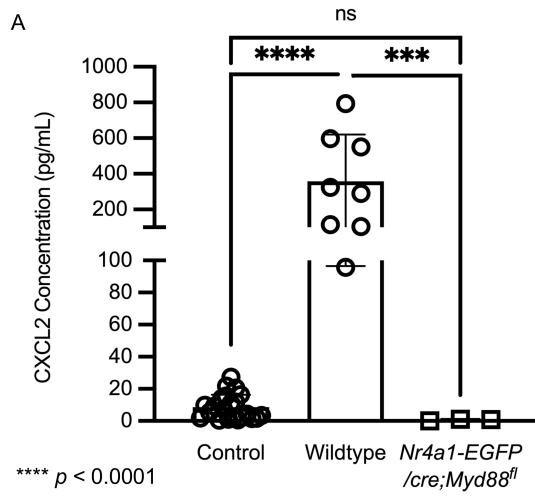

**Supplemental Figure S4. *Nr4a1-EGFP/cre;Myd88<sup>fl</sup>* NCM do not respond to TLR2 and TLR4 agonists.**  
**(S4A)** CXCL2 concentration from splenic non-classical monocytes isolated from C57BL/6J and *Nr4a1-EGFP/cre;Myd88<sup>fl</sup>* mice stimulated with 1 $\mu$ g of TLR2 (PAM3CSK4) and TLR4 (LPS) for four hours. *P*-values were calculated using a one-way ANOVA.

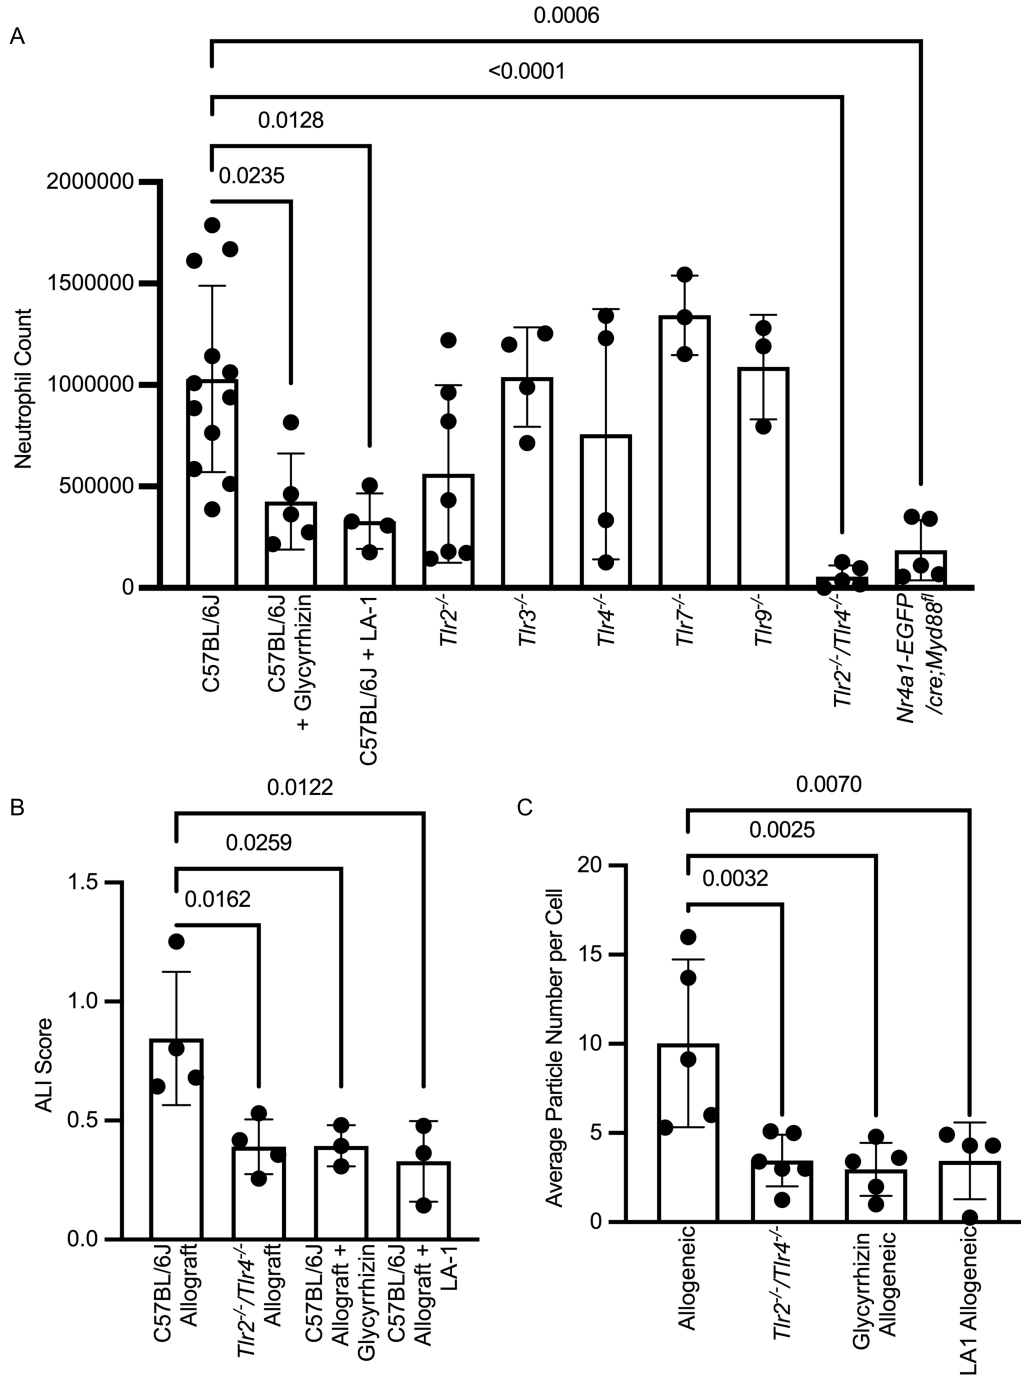

**Figure S5. Multivariate statistical analyses found for lung transplant neutrophils, ALI scores, and particle counts (S5A)** To minimize variation between experiments, all experiments in this manuscript were performed by the same murine lung transplant surgeon. For the primary endpoint of neutrophil recruitment to the allograft, experiments were conducted in individual cohorts of mice as presented in Figures 3, 6 and 8. As these cohorts could not be truly contemporaneous, comparison between the untreated wild-type control transplants and transplants after different interventions were made with a one way ANOVA followed by a Dunnett's test to correct for multiple comparisons. These results are referenced in the main legends for Figures 3, 6 and 8. **(S5B)** A group of control mice and mice treated with the indicated interventions were used to measure ALI scores. P values were compared using a one-way ANOVA followed by a Dunnett's test for multiple comparisons and are referenced in Figures 3,6 and 8. **(S5C)** The same group of control mice and mice treated with the indicated interventions in Figure S5B were used to measure ALI scores. P values were compared using a one-way ANOVA followed by a Dunnett's test for multiple comparisons and are referenced in Figures 3,6 and 8

**Supplemental Table 1. Flow cytometry analysis and sorting antibody cocktails.**

| Fluorochrome                             | Antibody               | Company/Clone           | Dilution |
|------------------------------------------|------------------------|-------------------------|----------|
| Lung Transplant Myeloid                  |                        |                         |          |
| eF450                                    | Ly6C                   | eBioscience HK1.4       | 1:500    |
| eF506                                    | Fixable Viability      | eBioscience             | 1:500    |
| FITC                                     | CD45                   | BioLegend 30-F11        | 1:250    |
| PerCPCy5.5                               | IA/IE                  | BioLegend MS/114.15.2   | 1:1000   |
| PE                                       | CD64                   | BioLegend X54-517.1     | 1:500    |
| PECF594                                  | SiglecF                | BD Bioscience E50-2440  | 1:500    |
| PECy7                                    | CD11c                  | BD Bioscience HL3       | 1:500    |
| APC                                      | CD24                   | eBioscience M1/69       | 1:500    |
| APCCy7                                   | CD11b                  | BD Bioscience M1/70     | 1:500    |
| AF700                                    | Ly6G                   | BD Bioscience IA8       | 1:250    |
|                                          | NK1.1                  | BD Bioscience PK136     | 1:166    |
| No CD11b NCM sort                        |                        |                         |          |
| BV421                                    | Ly6C                   | eBioscience HK1.4       | 1:500    |
| eF506                                    | Fixable Viability      | eBioscience             | 1:500    |
| FITC                                     | CD43                   | eBioscience eBioR2/60   | 1:500    |
| PE                                       | CXCR1                  | BioLegend SA011F11      | 1:500    |
| PECy7                                    | CD11c                  | BD Bioscience HL3       | 1:500    |
|                                          | IA/IE                  | BioLegend M/115.15.2    | 1:1000   |
|                                          | Ly6G                   | BioLegend IA8           | 1:250    |
|                                          | MerTK                  | eBioscience DS5MMER     | 1:500    |
|                                          | NK1.1                  | Life Technologies PK136 | 1:166    |
| No CD11b lung phenotype                  |                        |                         |          |
| BUV496                                   | CD24                   | BD Bioscience M1/69     | 1:500    |
| eF450                                    | Ly6C                   | eBioscience HK1.4       | 1:500    |
| eF506                                    | Fixable Viability      | eBioscience             | 1:500    |
| FITC                                     | CD3                    | ThermoFisher 17A2       | 1:166    |
| PerCPCy5.5                               | IA/IE                  | BioLegend MS/114.15.2   | 1:1000   |
| PE                                       | CX3CR1                 | BioLegend SA011F11      | 1:500    |
| PECF594                                  | SiglecF                | BD Bioscience E50-2440  | 1:500    |
| PECy7                                    | CD11c                  | BD Bioscience HL3       | 1:500    |
| APC                                      | CD19                   | BD Bioscience 1D3       | 1:500    |
| APCCy7                                   | CD45                   | BD Bioscience 30-F11    | 6:1000   |
| AF700                                    | Ly6G                   | BD Bioscience IA8       | 1:250    |
|                                          | NK1.1                  | BD Bioscience PK136     | 1:166    |
| No CD11b spleen phenotype                |                        |                         |          |
| eF450                                    | Ly6C                   | eBioscience HK1.4       | 1:500    |
| eF506                                    | Fixable Viability      | eBioscience             | 1:500    |
| FITC                                     | CD3                    | ThermoFisher 17A2       | 1:166    |
| PerCPCy5.5                               | IA/IE                  | BioLegend MS/114.15.2   | 1:1000   |
| PE                                       | CX3CR1                 | BioLegend SA011F11      | 1:500    |
| PECF594                                  | CD19                   | BD Bioscience 1D3       | 1:166    |
| PECy7                                    | CD11c                  | BD Bioscience HL3       | 1:500    |
| APC                                      | F4/80                  | eBioscience BM8         | 1:500    |
| AF700                                    | Ly6G                   | BD Bioscience IA8       | 1:250    |
|                                          | NK1.1                  | BD Bioscience PK136     | 1:166    |
| Immunohistochemistry/Immunocytochemistry |                        |                         |          |
| Uncong                                   | MyD88                  | Novus Biologicals       | 1:200    |
| AF594                                    | CD11b                  | BioLegend M1/70         | 1:100    |
| AF488                                    | Donkey Anti-Rabbit IgG | Abcam                   | 1:200    |
| AF647                                    | Donkey Anti-Rabbit IgG | Abcam                   | 1:200    |
| Hoescht 33342                            | nuclear                | Life Technologies       | 1:1000   |
